# Supplementary material for: Physicochemical Analysis of Urine and Sediment in Individuals With Lower Urinary Tract Dysfunction Utilizing Intermittent Catheters
Source: Research Square preprint supplement (doi:10.21203/rs.3.rs-7156397/v1), 2025-09-23
Supplement: Supplementary file 1 [file 25d250333e74467f1fd8baa8.docx]

# Supplemental Materials

*
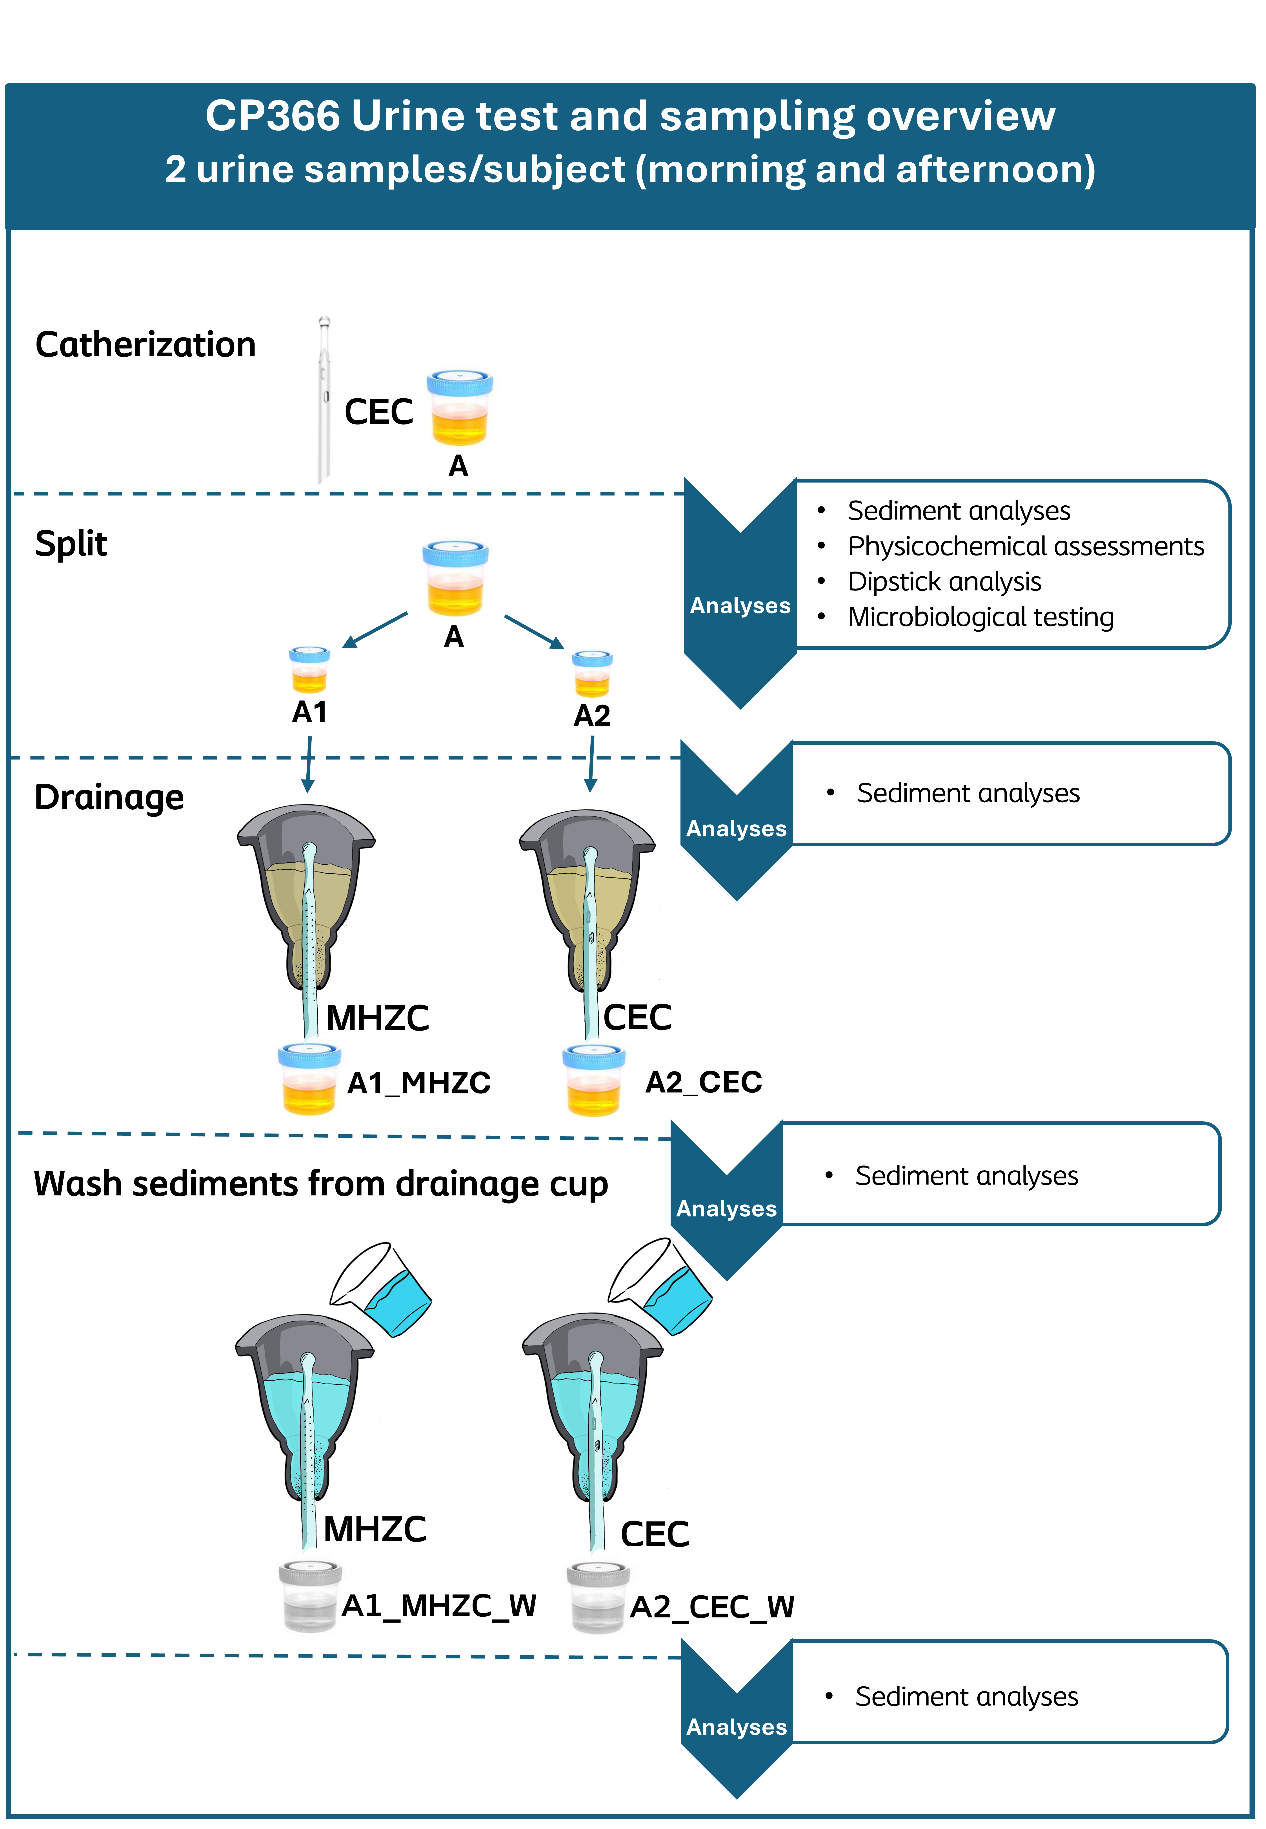
*

*Figure S1. Urine sample processing pipeline and applied analyses at each stage of processing. MHZC = Micro-hole zone catheter. CEC = Conventional Eyelet Catheter.*

| **Urinary dipstick tests** | **Group A (n=22)** | **Group B (n=22)** | **Group C (n=18)** | **Group D (n=44)** |
| --- | --- | --- | --- | --- |
| **Protein, n (%)** | | | | |
| >= 300 mg/dL | 0 (0) | 0 (0) | 0 (0) | 1 (2.3) |
| 100 mg/dL | 0 (0) | 0 (0) | 0 (0) | 3 (6.8) |
| 30 mg/dL | 2 (9.1) | 0 (0) | 0 (0) | 0 (0) |
| Negative | 19 (86.4) | 22 (100) | 17 (94.4) | 38 (86.4) |
| Trace | 1 (4.5) | 0 (0) | 1 (5.6) | 2 (4.5) |
| **Blood, n (%)*** | | | | |
| Level 1 | 12 (54.4) | 19 (86.4) | 15 (83.3) | 24 (54.5) |
| Level 2 | 8 (36.4) | 1 (4.5) | 1 (5.6) | 6 (13.6) |
| Level 3 | 0 (0) | 1 (4.5) | 1 (5.6) | 2 (4.5) |
| Level 4 | 0 (0) | 0 (0) | 0 (0) | 0 (0) |
| Level 5 | 2 (9.1) | 1 (4.5) | 1 (5.6) | 3 (6.8) |
| Level 6 | 0 (0) | 0 (0) | 0 (0) | 4 (9.1) |
| Level 7 | 0 (0) | 0 (0) | 0 (0) | 5 (11.4) |
| **Leukocytes, n (%)** | | | | |
| 0 | 14 (63.6) | 14 (63.6) | 10 (55.6) | 9 (20.5) |
| 1+ | 0 (0.0) | 3 (13.6) | 4 (22.2) | 10 (22.7) |
| 2+ | 6 (27.3) | 4 (18.2) | 2 (11.1) | 9 (20.5) |
| 3+ | 0 (0.0) | 1 (4.5) | 2 (11.1) | 9 (20.5) |
| 4+ | 2 (9.1) | 0 (0.0) | 0 (0.0) | 7 (15.9) |
| **Nitrites, n (%)** | | | | |
| Positive | 5 (22.7) | 0 (0.0) | 3 (16.7) | 7 (15.9) |
| Negative | 17 (77.3) | 22 (100) | 15 (83.3) | 37 (84.1) |
| **Glucose, n (%)** | | | | |
| 100 mg/dL | 3 (13.6) | 0 (0.0) | 0 (0.0) | 1 (2.3) |
| 500 mg/dL | 1 (4.5) | 0 (0.0) | 0 (0.0) | 0 (0.0) |
| >=1000 mg/dL | 2 (9.1) | 0 (0.0) | 0 (0.0) | 2 (4.5) |
| Negative | 16 (72.7) | 22 (100) | 18 (100) | 41 (93.2) |
| **Ketones, n (%)** | | | | |
| 15 mg/dL | 1 (4.5) | 0 (0.0) | 0 (0.0) | 2 (4.5) |
| 40 mg/dL | 1 (4.5) | 0 (0.0) | 0 (0.0) | 0 (0.0) |
| Negative | 20 (90.9) | 22 (100) | 18 (100) | 42 (95.5) |
| **Bilirubin, n (%)** | | | | |
| Positive | 0 (0.0) | 0 (0.0) | 0 (0.0) | 0 (0.0) |
| Negative | 22 (100) | 22 (100) | 18 (100) | 44 (100) |
| **Urobilinogen, n (%)** | | | | |
| 0.2 mg/dL | 21 (95.5) | 22 (100) | 18 (100) | 43 (97.7) |
| 1.0 mg/dL | 1 (4.5) | 0 (0.0) | 0 (0.0) | 1 (2.3) |
| **Specific Gravity, n (%)** | | | | |
| <= 1.005 | 1 (4.5) | 3 (13.6) | 0 (0.0) | 0 (0.0) |
| 1.010 | 3 (13.6) | 4 (18.2) | 5 (27.8) | 17 (38.6) |
| 1.015 | 6 (27.3) | 8 (36.4) | 8 (44.4) | 10 (22.7) |
| 1.020 | 7 (31.8) | 4 (18.2) | 3 (16.7) | 7 (15.9) |
| 1.025 | 3 (13.6) | 2 (9.1) | 2 (11.1) | 5 (11.4) |
| >= 1.030 | 2 (9.1) | 1 (4.5) | 0 (0.0) | 5 (11.4) |
| **pH** | | | | |
| Mean (SD) | 6.0 (0.7) | 6.4 (0.9) | 6.4 (0.8) | 5.9 (0.7) |

*Table S1: *Explanation of hematuria levels: Level 1: 0 erythrocytes/mL (non-hemolyzed), Level 2: 10 erythrocytes/mL (non-hemolyzed), Level 3: 80 erythrocytes/mL (non-hemolyzed), Level 4: 10 erythrocytes/mL (hemolyzed), Level 5: 25 erythrocytes/mL (hemolyzed), Level 6: 80 erythrocytes/mL (hemolyzed), Level 7: 200 erythrocytes/mL (hemolyzed). The specified number of samples (n) includes both samples that were collected from each subject.*

*
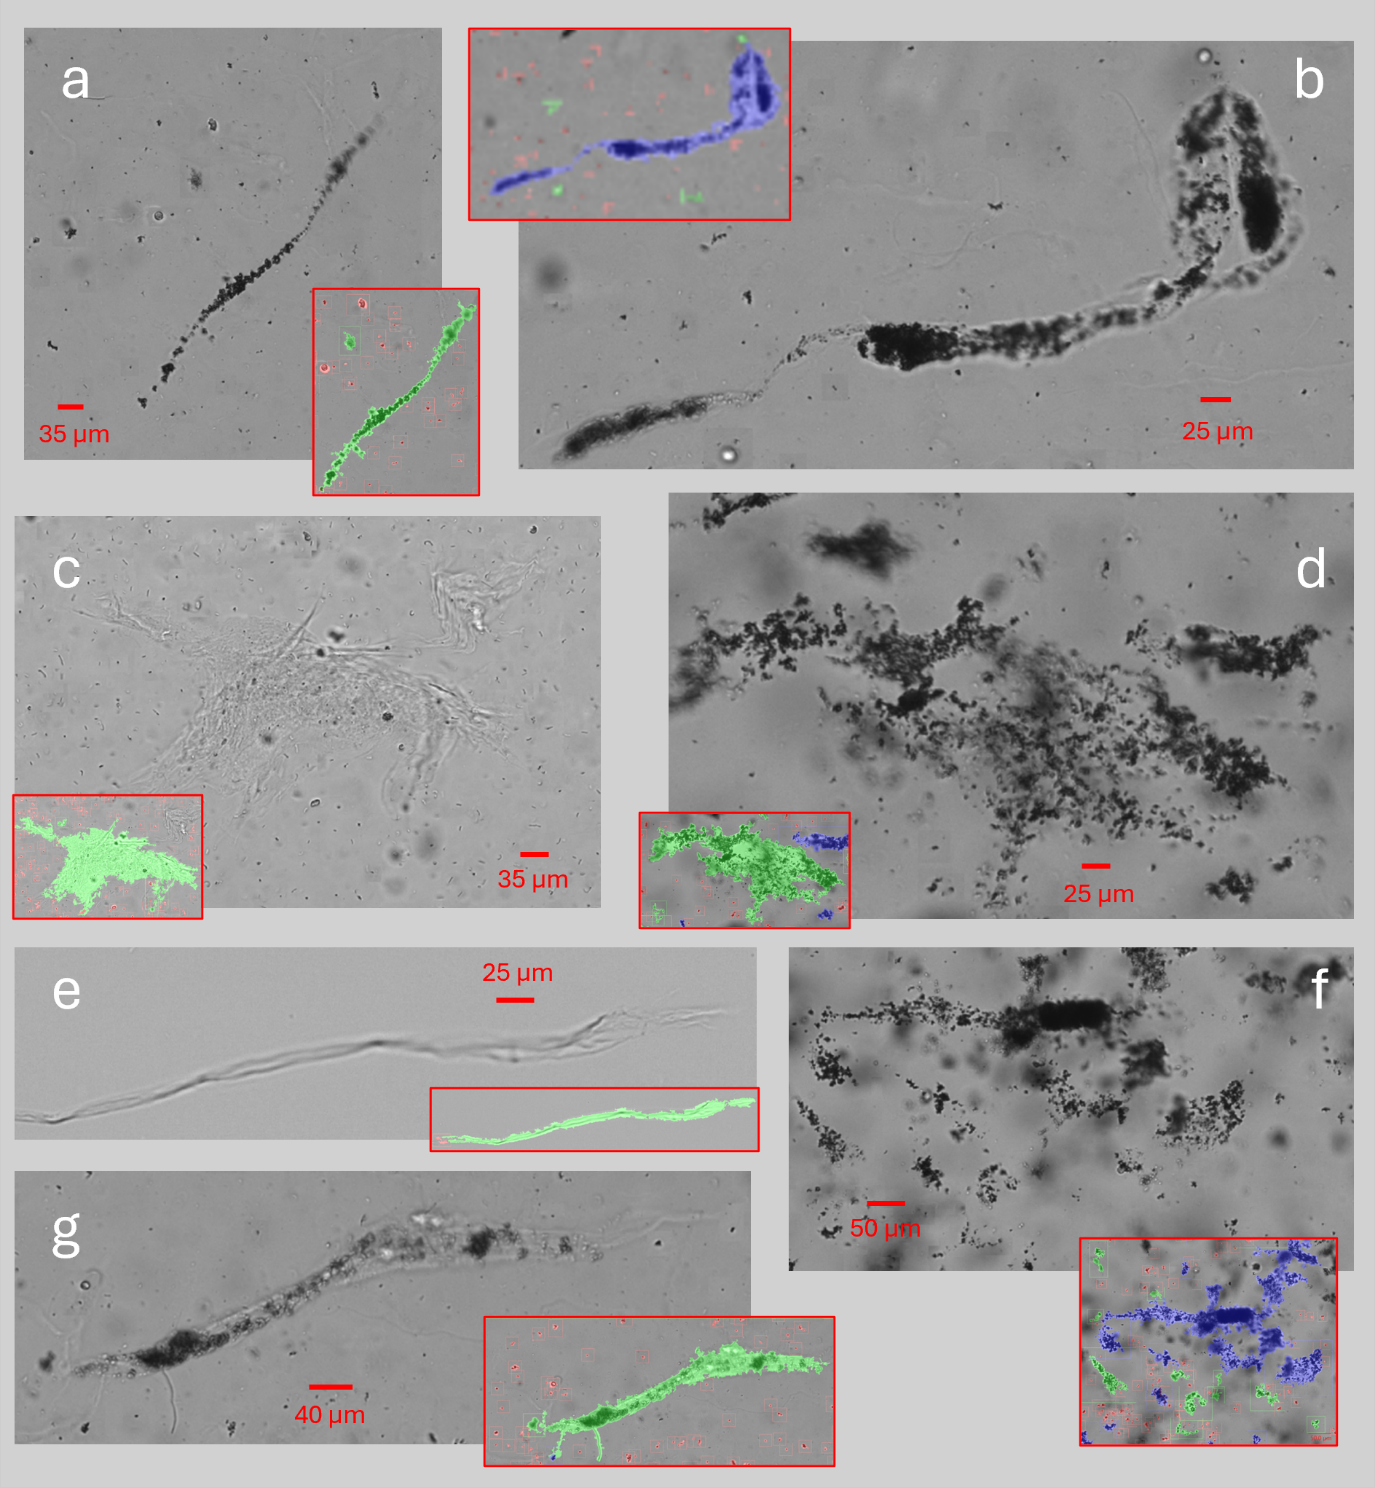
*

*Figure S2: Examples of large particles (range* 400-661 μm) *identified as sediment and segmented by the sediment analysis as a single compound. Overlayed images in red frames indicate how the particles in the corresponding image were segmented into separate compounds. Figures 5a-e were found in the freshly drained urine samples (sample A). Figures 5f+g were found in the aliquots which had been passed through a MHZC (A1_MHZC).*
